# Supplementary material for: Phytochemical Profile, Antiradical Capacity and α-Glucosidase Inhibitory Potential of Wild Arbutus unedo L. Fruits from Central Italy: A Chemometric Approach
Source: PubMed Central journal article supplement (PMC7766221; doi:10.3390/plants9121785), 2020-12-16
Supplement: plants-09-01785-s001.pdf [file plants-09-01785-s001.pdf]

**Table S1.**

Spectral features of *A. unedo* wild berries analysed.

| Origin     | Group Frequency wavenumber (cm <sup>-1</sup> ) | Vibration modes          |
|------------|------------------------------------------------|--------------------------|
| O-H        | 3300                                           | Stretching vibration     |
| C-H        | 2970, 2935                                     | Symmetric and asymmetric |
| C-H; -CO-H | 2870                                           | Stretching vibration     |
| C=O        | 1750                                           | Stretching vibration     |
| C-C-O      | 1500-1450                                      | Stretching vibration     |
| COO-C      | 1078                                           | Stretching vibration     |
